# Supplementary material for: Sonochemical process for the preparation of α-CuSe nanocrystals and flakes
Source: Royal Society of Chemistry journal article supplement (doi:10.1039/b206193g), 2002-01-01
Supplement: b206193g.pdf [file b206193g.pdf]

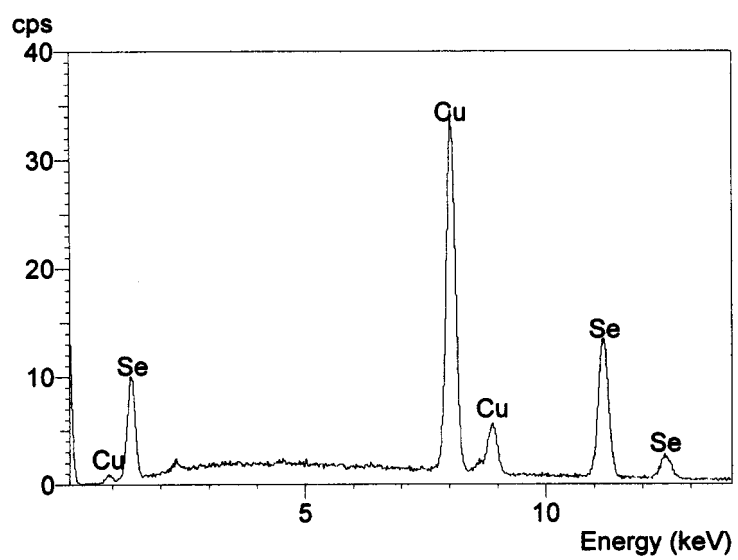

**Figure S1** EDAX analysis of sample I

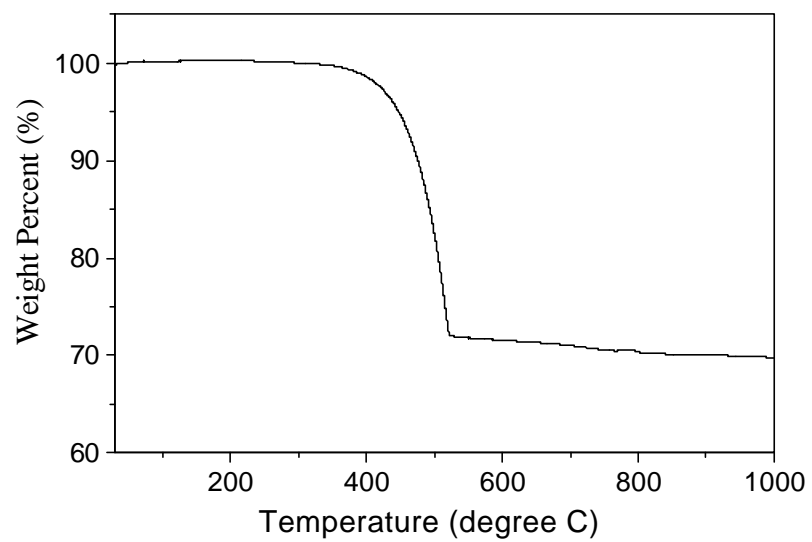

**Figure S2** TGA curve of sample I under Ar atmosphere.

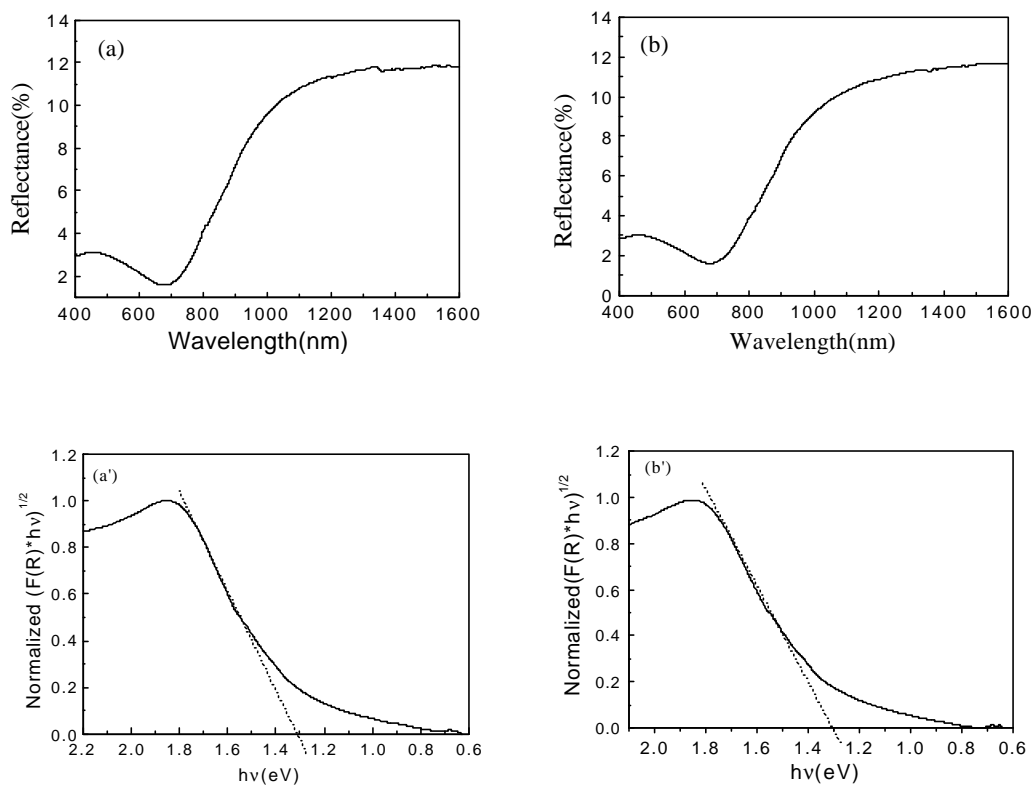

**Figure S3** DRS of the sample I ((a)) and III ((b)); the normalized plots of  $(F(R) \cdot hv)^{1/2}$  versus  $hv$  (eV) ((a') and (b')) corresponding to the data deriving from spectra (a) and (b).
